# Supplementary material for: Analysis of 100 high-coverage genomes from a pedigreed captive baboon colony
Source: PubMed Central journal article supplement — Genome Res. 2019 May;29(5):848–56. doi: 10.1101/gr.247122.118 (PMC6499309; doi:10.1101/gr.247122.118), 2019-05
Supplement: supp_gr.247122.118_Supplemental_Material.pdf [file supp_gr.247122.118_Supplemental_Material.pdf]

## SUPPLEMENTAL MATERIAL

### Analysis of 100 high coverage genomes from a pedigreed captive baboon colony

Jacqueline A. Robinson<sup>1\*</sup>, Saurabh Belsare<sup>1</sup>, Shifra Birnbaum<sup>2</sup>, Deborah E. Newman<sup>2</sup>, Jeannie Chan<sup>2</sup>, Jeremy P. Glenn<sup>2</sup>, Betsy Ferguson<sup>3</sup>, Laura A. Cox<sup>4,5</sup> and Jeffrey D. Wall<sup>1</sup>

<sup>1</sup>Institute for Human Genetics, University of California, San Francisco, CA 94143

<sup>2</sup>Department of Genetics, Texas Biomedical Research Institute, San Antonio, TX 78245

<sup>3</sup>Division of Genetics, Oregon National Primate Research Center, Beaverton, OR 97006 and Department of Molecular and Medical Genetics, Oregon Health and Science University, Portland, OR 97239

<sup>4</sup>Center for Precision Medicine, Department of Internal Medicine, Section of Molecular Medicine, Wake Forest School of Medicine, Winston-Salem, NC 27101

<sup>5</sup>Southwest National Primate Research Center, Texas Biomedical Research Institute, San Antonio, TX 78245

\*Contact:

Jacqueline A. Robinson  
Institute for Human Genetics  
University of California, San Francisco  
513 Parnassus Avenue, Suite 965  
San Francisco, CA 94143-0794  
jacqueline.robinson@ucsf.edu

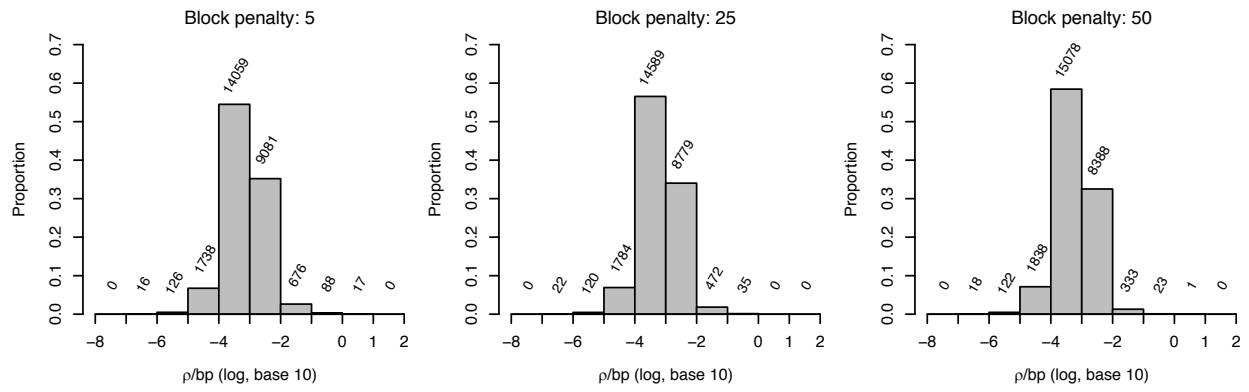

**Figure S1. Inferred recombination rates in baboons with varying block penalty values.** Estimates of  $\rho$ /bp were calculated in non-overlapping 100 kb windows across the genome (see Fig. 1). Numbers above bars indicate the number of windows in each bin. Results are largely consistent across multiple block penalty values.

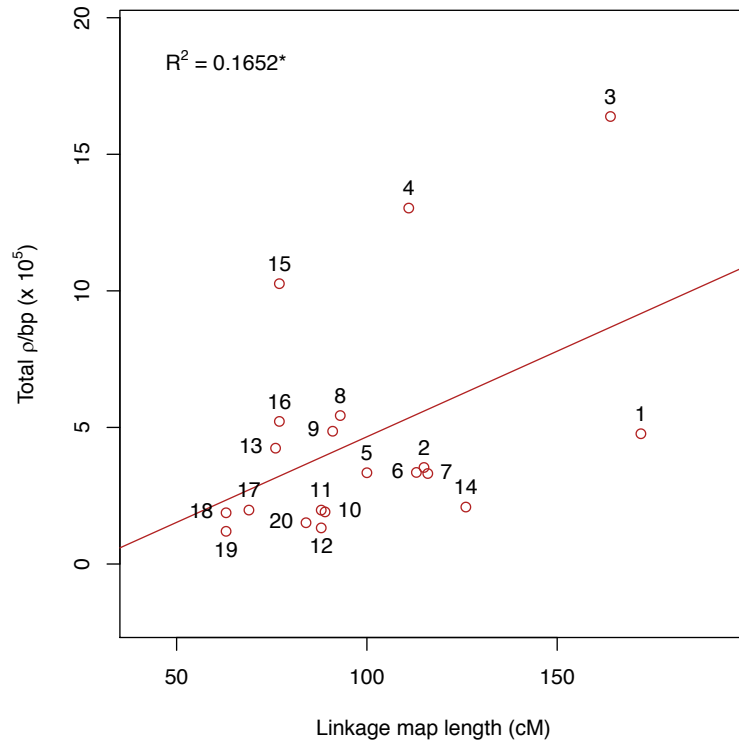

**Figure S2. Correlation between genetic map lengths inferred from microsatellites versus total  $\rho$  estimated using LDhelmet for each autosome.** The linkage map lengths were taken from Table 1 of Rogers et al. 2000. Total  $\rho$  was calculated by summing the estimated  $\rho$ /bp across all sites in each chromosome. The  $R^2$  correlation coefficient is the adjusted  $R^2$  value calculated with the *lm* function in R (R Core Team 2018). \* $p < 0.05$ .

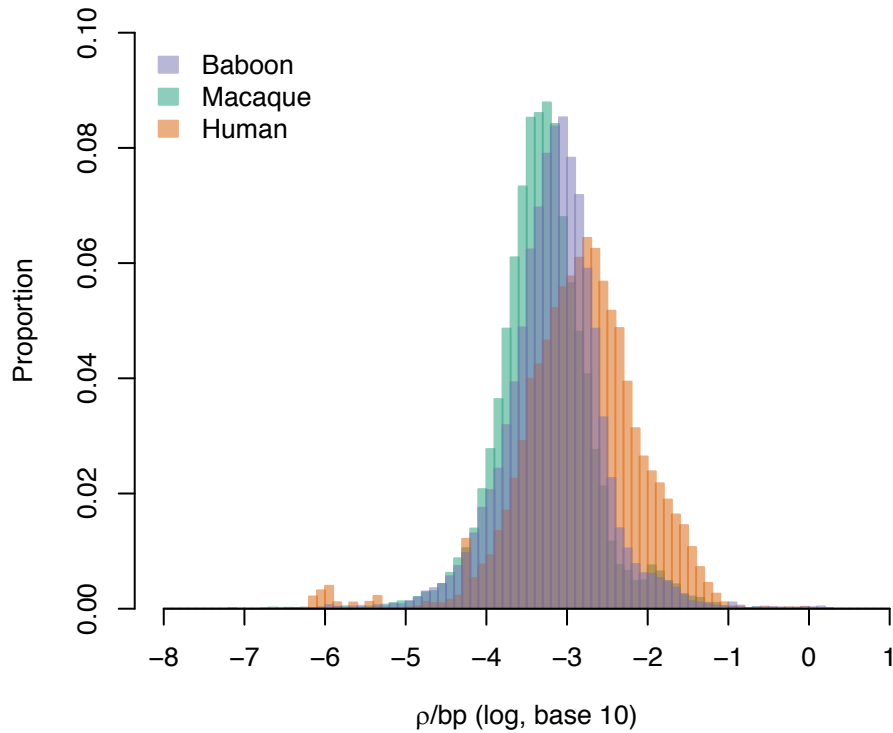

**Figure S3. Distribution of inferred recombination rates in three primate species.** Estimates of  $\rho/\text{bp}$  were calculated in non-overlapping 100 kb windows across the genome (see Fig. 1). In our analysis, estimates of recombination rates in baboons were the lowest overall in macaques, and highest overall in humans. Despite the generally elevated rate of recombination we observed in humans, the baboon dataset still contained a larger number of windows with extreme  $\rho$  values ( $>100$ -fold above the mean) than in the human dataset. The number of windows with extreme  $\rho$  values was also higher in baboons relative to macaques.

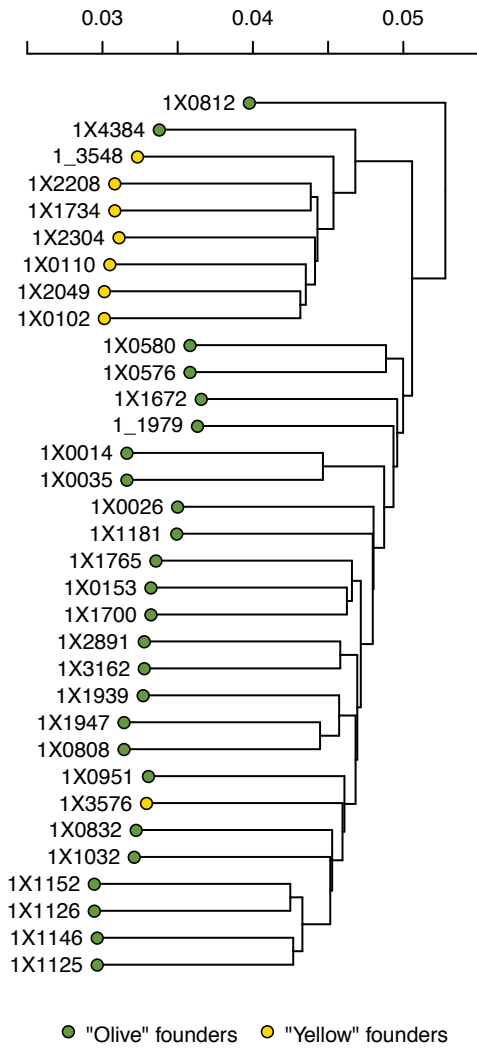

**Figure S4. IBS clustering of olive and yellow baboon founders.** Identity-by-state analysis shows distinct clusters of olive and yellow baboons, highlighting outliers (1X0812, 1X4384) and a mislabeled sample (1X3576). Results are consistent with patterns from PCA and ADMIXTURE analyses (Fig. 2, Fig. S5).

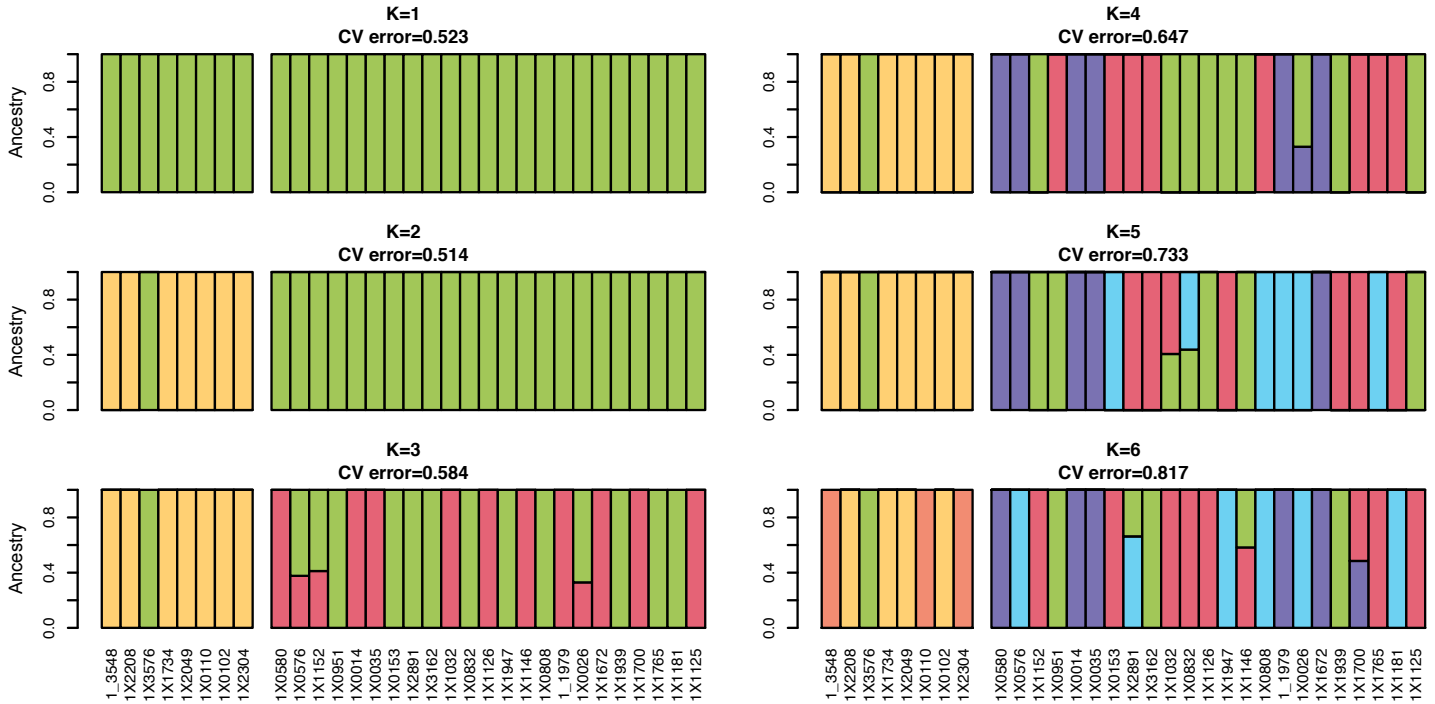

**Figure S5. Genetic ancestry of baboon founders under a range of K values.** The most likely number of ancestral populations (as indicated by the lowest cross-validation error) in 31 olive and yellow baboon founders is  $K=2$ . Here, the extreme outlier founders (1X0812, 1X4384) were excluded. The specimen misidentified as a yellow baboon (1X3576) is apparent. At higher K values, olive and yellow baboon partitions are unchanged, but more partitions within each group appear. None of our results suggest that the founders are the product of recent hybridization between olive and yellow baboons.

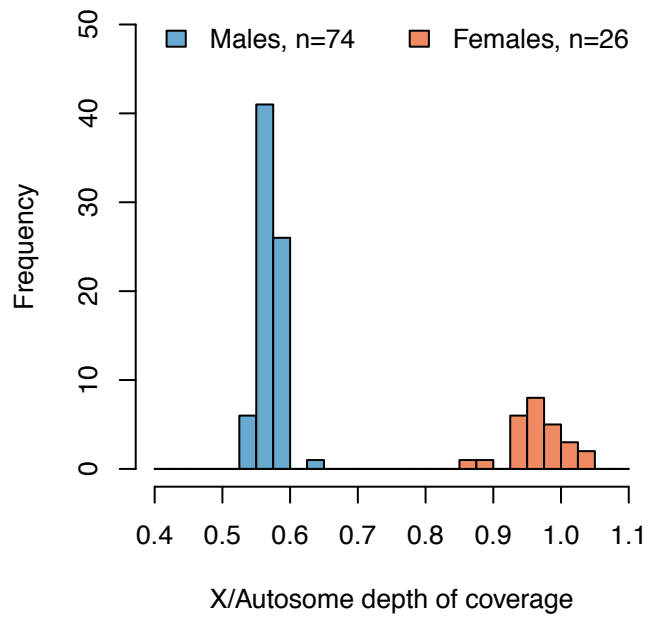

**Figure S6. Histogram of the ratio of sequence coverage on the X Chromosome relative to the autosomes.** Ratios are consistent with the labeled sex of all individuals, with males having approximately half as much sequence depth on the X Chromosome relative to the autosomes. Coverage statistics were calculated post-duplicate read removal.

**Table S1. List of individuals included in this study.** Type, sex,  $F_{ped}$  and admixture status are from colony records (e.g. the pedigree). Coverage statistics were calculated post-duplicate read removal.

| Sample ID | Sequencing ID | Type            | Sex | $F_{ped}$ (%) | Admixed | Mean coverage (×) | SRA Run ID                |
|-----------|---------------|-----------------|-----|---------------|---------|-------------------|---------------------------|
| 1_3548    | FR07886417    | Founder, yellow | F   | 0             | No      | 36.3              | SRR8285731                |
| 1X0102    | FR07921249    | Founder, yellow | M   | 0             | No      | 26.1              | SRR8285751                |
| 1X0110    | FR07921242    | Founder, yellow | F   | 0             | No      | 38.5              | SRR8285726                |
| 1X1734    | FR07921233    | Founder, yellow | F   | 0             | No      | 31.6              | SRR8285733                |
| 1X2049    | FR07921237    | Founder, yellow | F   | 0             | No      | 33.5              | SRR8285729                |
| 1X2208    | FR07886421    | Founder, yellow | F   | 0             | No      | 36.7              | SRR8285732                |
| 1X2304    | FR07921251    | Founder, yellow | M   | 0             | No      | 30.5              | SRR8285728                |
| 1X3576    | FR07921203    | Founder, yellow | M   | 0             | No      | 34.6              | SRR8285727                |
| 1_1979    | FR07921245    | Founder, olive  | M   | 0             | No      | 33.6              | SRR8285766                |
| 1X0014    | FR07886416    | Founder, olive  | F   | 0             | No      | 35.2              | SRR8285765                |
| 1X0026    | FR07921246    | Founder, olive  | F   | 0             | No      | 35.0              | SRR8285721                |
| 1X0035    | FR07886425    | Founder, olive  | F   | 0             | No      | 27.3              | SRR8285748                |
| 1X0153    | FR07886426    | Founder, olive  | F   | 0             | No      | 28.8              | SRR8285749                |
| 1X0576    | FR07886409    | Founder, olive  | F   | 0             | No      | 28.9              | SRR8285730                |
| 1X0580    | FR07886405    | Founder, olive  | F   | 0             | No      | 35.6              | SRR8285763                |
| 1X0808    | FR07921241    | Founder, olive  | M   | 0             | No      | 32.6              | SRR8285767                |
| 1X0812    | FR07886420    | Founder, olive  | F   | 0             | No      | 36.5              | SRR8285747                |
| 1X0832    | FR07921221    | Founder, olive  | M   | 0             | No      | 38.0              | SRR8285722                |
| 1X0951    | FR07886413    | Founder, olive  | M   | 0             | No      | 34.0              | SRR8285764                |
| 1X1032    | FR07921215    | Founder, olive  | F   | 0             | No      | 33.3              | SRR8285723                |
| 1X1125    | FR07921272    | Founder, olive  | F   | 0             | No      | 34.5              | SRR8723580                |
| 1X1126    | FR07921226    | Founder, olive  | M   | 0             | No      | 36.8              | SRR8285768,<br>SRR8285734 |
| 1X1146    | FR07921240    | Founder, olive  | F   | 0             | No      | 34.1              | SRR8285724                |
| 1X1152    | FR07886411    | Founder, olive  | F   | 0             | No      | 34.7              | SRR8285735                |
| 1X1181    | FR07921270    | Founder, olive  | F   | 0             | No      | 34.3              | SRR8723583                |
| 1X1672    | FR07921258    | Founder, olive  | M   | 0             | No      | 35.0              | SRR8285720                |
| 1X1700    | FR07921265    | Founder, olive  | M   | 0             | No      | 36.0              | SRR8723582                |
| 1X1765    | FR07921266    | Founder, olive  | M   | 0             | No      | 28.9              | SRR7639477,<br>SRR7639464 |
| 1X1939    | FR07921262    | Founder, olive  | M   | 0             | No      | 35.0              | SRR8285736                |
| 1X1947    | FR07921235    | Founder, olive  | M   | 0             | No      | 30.1              | SRR8285725                |
| 1X2891    | FR07919467    | Founder, olive  | M   | 0             | No      | 22.3              | SRR8285754                |
| 1X3162    | FR07921212    | Founder, olive  | M   | 0             | No      | 36.3              | SRR8285753                |
| 1X4384    | FR07921206    | Founder, olive  | M   | 0             | No      | 35.1              | SRR8285752                |
| 6716      | FR07918883    | Captive-born    | M   | 0             | Yes     | 36.5              | SRR7624578                |
| 7091      | FR07886418    | Captive-born    | M   | 0             | No      | 36.4              | SRR7588759                |
| 7158      | FR07886424    | Captive-born    | M   | 12.5          | Yes     | 35.3              | SRR7588766                |
| 7937      | FR07937957    | Captive-born    | M   | 0             | Yes     | 33.6              | SRR7624575                |
| 8170      | FR07918874    | Captive-born    | M   | 0             | No      | 33.8              | SRR7624576                |
| 8344      | FR07886410    | Captive-born    | M   | 0             | Yes     | 30.2              | SRR7588765                |
| 8465      | FR07886414    | Captive-born    | M   | 12.5          | Unknown | 33.4              | SRR7588764                |
| 8653      | FR07886404    | Captive-born    | M   | 25            | No      | 33.5              | SRR7588763                |
| 8780      | FR07918882    | Captive-born    | M   | 0             | No      | 36.0              | SRR7624579                |
| 9562      | FR07918881    | Captive-born    | M   | 0             | No      | 33.6              | SRR7624580                |
| 9656      | FR07937989    | Captive-born    | M   | 0             | Yes     | 33.4              | SRR7624592                |



|              |            |              |   |        |         |      |                                                                                                                                                   |
|--------------|------------|--------------|---|--------|---------|------|---------------------------------------------------------------------------------------------------------------------------------------------------|
| <b>9841</b>  | 9841       | Captive-born | F | 0      | No      | 39.7 | SRR8723575,<br>SRR8723574,<br>SRR8723573,<br>SRR8723572,<br>SRR8723571,<br>SRR8723570,<br>SRR8723569,<br>SRR8723568,<br>SRR8723567                |
| <b>9860</b>  | FR07919264 | Captive-born | M | 0      | Yes     | 28.7 | SRR7624591                                                                                                                                        |
| <b>10173</b> | FR07937952 | Captive-born | M | 0      | No      | 21.4 | SRR8723601,<br>SRR8723600,<br>SRR8723599,<br>SRR8723598,<br>SRR8723597,<br>SRR8723596,<br>SRR8723595,<br>SRR8723594,<br>SRR8723593,<br>SRR8723592 |
| <b>10192</b> | FR07918860 | Captive-born | M | 0      | Unknown | 26.3 | SRR7624582                                                                                                                                        |
| <b>10349</b> | FR07937956 | Captive-born | M | 12.5   | Yes     | 33.9 | SRR7624581                                                                                                                                        |
| <b>10488</b> | FR07937951 | Captive-born | M | 0      | Yes     | 27.3 | SRR7624584                                                                                                                                        |
| <b>11887</b> | FR07919462 | Captive-born | M | 0      | Unknown | 36.7 | SRR7588769                                                                                                                                        |
| <b>12242</b> | 12242      | Captive-born | F | 0      | No      | 31.9 | SRR8723564,<br>SRR8723553,<br>SRR8723551,<br>SRR8723550,<br>SRR8723549,<br>SRR8723548,<br>SRR8723547,<br>SRR8723545,<br>SRR8723544,<br>SRR8723543 |
| <b>13245</b> | FR07921581 | Captive-born | M | 0      | Unknown | 35.7 | SRR7588767                                                                                                                                        |
| <b>13644</b> | FR07886422 | Captive-born | M | 0      | Yes     | 35.2 | SRR6710899,<br>SRR7588768                                                                                                                         |
| <b>14022</b> | FR07919116 | Captive-born | M | 12.5   | Yes     | 33.3 | SRR7624586                                                                                                                                        |
| <b>14182</b> | FR07919265 | Captive-born | M | 15.625 | Yes     | 29.4 | SRR7624585                                                                                                                                        |
| <b>14276</b> | FR07886415 | Captive-born | M | 3.125  | Yes     | 36.3 | SRR7588774,<br>SRR7588771                                                                                                                         |
| <b>14460</b> | FR07937948 | Captive-born | M | 9.375  | Yes     | 27.9 | SRR7624588                                                                                                                                        |
| <b>14652</b> | FR07921230 | Captive-born | M | 25     | No      | 34.8 | SRR7588772                                                                                                                                        |
| <b>14712</b> | FR07921574 | Captive-born | M | 0      | Unknown | 32.3 | SRR7588775                                                                                                                                        |
| <b>14925</b> | FR07919266 | Captive-born | M | 12.5   | No      | 27.7 | SRR7624587                                                                                                                                        |
| <b>14930</b> | FR07918884 | Captive-born | M | 6.25   | No      | 34.7 | SRR7624590                                                                                                                                        |
| <b>14959</b> | FR07921575 | Captive-born | M | 12.5   | No      | 37.3 | SRR7588776                                                                                                                                        |
| <b>15009</b> | FR07921250 | Captive-born | M | 12.5   | No      | 37.1 | SRR7588779                                                                                                                                        |
| <b>15107</b> | FR07921573 | Captive-born | M | 12.5   | Yes     | 33.7 | SRR7588780                                                                                                                                        |
| <b>15150</b> | FR07886407 | Captive-born | M | 18.75  | No      | 35.7 | SRR7588777                                                                                                                                        |
| <b>15156</b> | FR07919118 | Captive-born | M | 12.5   | No      | 30.3 | SRR7624589                                                                                                                                        |
| <b>15190</b> | FR07921577 | Captive-born | M | 12.5   | No      | 36.7 | SRR7588778                                                                                                                                        |
| <b>15197</b> | FR07919164 | Captive-born | M | 12.5   | Unknown | 23.8 | SRR7624598                                                                                                                                        |
| <b>15421</b> | FR07921261 | Captive-born | M | 12.5   | Yes     | 31.9 | SRR7588783                                                                                                                                        |

|              |            |              |   |        |         |      |                                                                                                                     |
|--------------|------------|--------------|---|--------|---------|------|---------------------------------------------------------------------------------------------------------------------|
| <b>15444</b> | 15444      | Captive-born | F | 12.5   | No      | 32.2 | SRR7639485,<br>SRR7693040,<br>SRR7693041,<br>SRR7698981,<br>SRR7656061,<br>SRR7639484,<br>SRR7639481                |
| <b>15467</b> | FR07921218 | Captive-born | M | 12.5   | No      | 35.1 | SRR7588784                                                                                                          |
| <b>15626</b> | FR07886408 | Captive-born | M | 25     | No      | 36.2 | SRR7588781                                                                                                          |
| <b>15628</b> | FR07918879 | Captive-born | M | 18.75  | No      | 34.8 | SRR7624597                                                                                                          |
| <b>15633</b> | FR07919257 | Captive-born | M | 15.625 | Yes     | 28.8 | SRR7624596                                                                                                          |
| <b>16413</b> | 16413      | Captive-born | F | 12.5   | No      | 31.3 | SRR7639489,<br>SRR7639483                                                                                           |
| <b>16517</b> | 16517      | Captive-born | M | 12.5   | No      | 31.5 | SRR7639488,<br>SRR7639487,<br>SRR7639486                                                                            |
| <b>17199</b> | 17199      | Captive-born | F | 12.5   | No      | 32.8 | SRR7639479,<br>SRR7656071,<br>SRR7656072,<br>SRR7656073,<br>SRR7639478,<br>SRR7639467                               |
| <b>18385</b> | 18385      | Captive-born | F | 12.5   | No      | 42.2 | SRR8723591,<br>SRR8723590,<br>SRR8723581,<br>SRR8723579,<br>SRR8723578,<br>SRR8723577,<br>SRR8723576,<br>SRR8723563 |
| <b>18929</b> | FR07919259 | Captive-born | M | 0      | Unknown | 33.9 | SRR7624595                                                                                                          |
| <b>19181</b> | 19181      | Captive-born | F | 12.5   | No      | 42.3 | SRR7639469,<br>SRR7639468,<br>SRR7639466,<br>SRR7656098,<br>SRR7656099,<br>SRR7656100                               |
| <b>19207</b> | FR07919100 | Captive-born | M | 0      | Unknown | 36.0 | SRR7624602                                                                                                          |
| <b>19348</b> | 19348      | Captive-born | F | 12.5   | No      | 35.7 | SRR7639473,<br>SRR7639471,<br>SRR7639470                                                                            |
| <b>25347</b> | FR07937990 | Captive-born | M | 0      | Unknown | 26.8 | SRR7624573                                                                                                          |
| <b>26196</b> | FR07919258 | Captive-born | M | 0      | Yes     | 31.3 | SRR7624574                                                                                                          |
| <b>26988</b> | 26988      | Captive-born | F | 12.5   | No      | 38.3 | SRR8723562,<br>SRR8723561,<br>SRR8723560,<br>SRR8723559,<br>SRR8723558,<br>SRR8723557,<br>SRR8723556,<br>SRR8723555 |
| <b>27351</b> | FR07919260 | Captive-born | M | 12.5   | Yes     | 32.5 | SRR7624571                                                                                                          |

|               |            |              |   |         |         |      |                                                                                                                                                                  |
|---------------|------------|--------------|---|---------|---------|------|------------------------------------------------------------------------------------------------------------------------------------------------------------------|
| <b>28246</b>  | 28246      | Captive-born | M | 12.5    | No      | 32.8 | SRR8723589,<br>SRR8723588,<br>SRR8723587,<br>SRR8723586,<br>SRR8723585,<br>SRR8723584,<br>SRR8723566,<br>SRR8723565,<br>SRR8723554,<br>SRR8723552,<br>SRR8723546 |
| <b>28279</b>  | FR07918876 | Captive-born | M | 12.5    | Yes     | 29.8 | SRR7624572,<br>SRR8285741                                                                                                                                        |
| <b>28635</b>  | FR07918877 | Captive-born | M | 23.4375 | Yes     | 27.0 | SRR7624577,<br>SRR8285742                                                                                                                                        |
| <b>1X2231</b> | FR07919268 | Captive-born | M | 0       | No      | 36.5 | SRR7624601                                                                                                                                                       |
| <b>1X2816</b> | FR07886419 | Captive-born | M | 0       | No      | 36.9 | SRR7588785,<br>SRR7588782                                                                                                                                        |
| <b>1X3697</b> | FR07886406 | Captive-born | M | 0       | No      | 34.2 | SRR7588786                                                                                                                                                       |
| <b>1X3796</b> | FR07937955 | Captive-born | M | 0       | Yes     | 26.2 | SRR7624600                                                                                                                                                       |
| <b>1X3822</b> | FR07886412 | Captive-born | M | 0       | No      | 29.6 | SRR7588762                                                                                                                                                       |
| <b>1X3837</b> | FR07886403 | Captive-born | M | 0       | Yes     | 34.6 | SRR7588761                                                                                                                                                       |
| <b>1X4179</b> | FR07919267 | Captive-born | M | 0       | No      | 36.4 | SRR7624599                                                                                                                                                       |
| <b>1X4209</b> | FR07937953 | Captive-born | M | 0       | Unknown | 27.6 | SRR7624594                                                                                                                                                       |
| <b>1X4777</b> | FR07886423 | Captive-born | M | 0       | Yes     | 35.7 | SRR7588760                                                                                                                                                       |
| <b>1X4853</b> | FR07919263 | Captive-born | M | 0       | Yes     | 29.9 | SRR7624593                                                                                                                                                       |

**Table S2. Genetic ancestry assignments from ADMIXTURE.** Samples are listed in the same order as in Table S1. Values that are bold and italicized were inferred using unsupervised ADMIXTURE (see Figure S5), and the remaining values were inferred using projection.

| Sample ID     | Sequencing ID | Olive Ancestry         | Yellow Ancestry        |
|---------------|---------------|------------------------|------------------------|
| <b>1_3548</b> | FR07886417    | <b><i>0.000010</i></b> | <b><i>0.999990</i></b> |
| <b>1X0102</b> | FR07921249    | <b><i>0.000010</i></b> | <b><i>0.999990</i></b> |
| <b>1X0110</b> | FR07921242    | <b><i>0.000010</i></b> | <b><i>0.999990</i></b> |
| <b>1X1734</b> | FR07921233    | <b><i>0.000010</i></b> | <b><i>0.999990</i></b> |
| <b>1X2049</b> | FR07921237    | <b><i>0.000010</i></b> | <b><i>0.999990</i></b> |
| <b>1X2208</b> | FR07886421    | <b><i>0.000010</i></b> | <b><i>0.999990</i></b> |
| <b>1X2304</b> | FR07921251    | <b><i>0.000010</i></b> | <b><i>0.999990</i></b> |
| <b>1X3576</b> | FR07921203    | <b><i>0.999990</i></b> | <b><i>0.000010</i></b> |
| <b>1_1979</b> | FR07921245    | <b><i>0.999990</i></b> | <b><i>0.000010</i></b> |
| <b>1X0014</b> | FR07886416    | <b><i>0.995254</i></b> | <b><i>0.004746</i></b> |
| <b>1X0026</b> | FR07921246    | <b><i>0.999990</i></b> | <b><i>0.000010</i></b> |
| <b>1X0035</b> | FR07886425    | <b><i>0.987652</i></b> | <b><i>0.012348</i></b> |
| <b>1X0153</b> | FR07886426    | <b><i>0.999990</i></b> | <b><i>0.000010</i></b> |
| <b>1X0576</b> | FR07886409    | <b><i>0.999990</i></b> | <b><i>0.000010</i></b> |
| <b>1X0580</b> | FR07886405    | <b><i>0.999990</i></b> | <b><i>0.000010</i></b> |
| <b>1X0808</b> | FR07921241    | <b><i>0.999990</i></b> | <b><i>0.000010</i></b> |
| <b>1X0812</b> | FR07886420    | 0.902903               | 0.097097               |
| <b>1X0832</b> | FR07921221    | <b><i>0.999990</i></b> | <b><i>0.000010</i></b> |
| <b>1X0951</b> | FR07886413    | <b><i>0.999990</i></b> | <b><i>0.000010</i></b> |
| <b>1X1032</b> | FR07921215    | <b><i>0.999990</i></b> | <b><i>0.000010</i></b> |
| <b>1X1125</b> | FR07921272    | <b><i>0.999990</i></b> | <b><i>0.000010</i></b> |
| <b>1X1126</b> | FR07921226    | <b><i>0.999990</i></b> | <b><i>0.000010</i></b> |
| <b>1X1146</b> | FR07921240    | <b><i>0.999990</i></b> | <b><i>0.000010</i></b> |
| <b>1X1152</b> | FR07886411    | <b><i>0.999990</i></b> | <b><i>0.000010</i></b> |
| <b>1X1181</b> | FR07921270    | <b><i>0.999990</i></b> | <b><i>0.000010</i></b> |
| <b>1X1672</b> | FR07921258    | <b><i>0.999990</i></b> | <b><i>0.000010</i></b> |
| <b>1X1700</b> | FR07921265    | <b><i>0.999990</i></b> | <b><i>0.000010</i></b> |
| <b>1X1765</b> | FR07921266    | <b><i>0.999990</i></b> | <b><i>0.000010</i></b> |
| <b>1X1939</b> | FR07921262    | <b><i>0.999990</i></b> | <b><i>0.000010</i></b> |
| <b>1X1947</b> | FR07921235    | <b><i>0.999990</i></b> | <b><i>0.000010</i></b> |
| <b>1X2891</b> | FR07919467    | <b><i>0.999990</i></b> | <b><i>0.000010</i></b> |
| <b>1X3162</b> | FR07921212    | <b><i>0.999990</i></b> | <b><i>0.000010</i></b> |
| <b>1X4384</b> | FR07921206    | 0.032652               | 0.967348               |
| <b>6716</b>   | FR07918883    | 0.686213               | 0.313787               |
| <b>7091</b>   | FR07886418    | 0.991585               | 0.008415               |
| <b>7158</b>   | FR07886424    | 0.438236               | 0.561764               |
| <b>7937</b>   | FR07937957    | 0.994127               | 0.005873               |
| <b>8170</b>   | FR07918874    | 0.989328               | 0.010672               |
| <b>8344</b>   | FR07886410    | 0.523729               | 0.476271               |
| <b>8465</b>   | FR07886414    | 0.773239               | 0.226761               |
| <b>8653</b>   | FR07886404    | 0.999985               | 0.000015               |
| <b>8780</b>   | FR07918882    | 0.992469               | 0.007531               |
| <b>9562</b>   | FR07918881    | 0.999990               | 0.000010               |
| <b>9656</b>   | FR07937989    | 0.266671               | 0.733329               |
| <b>9841</b>   | 9841          | 0.995635               | 0.004365               |
| <b>9860</b>   | FR07919264    | 0.730542               | 0.269458               |
| <b>10173</b>  | FR07937952    | 0.984747               | 0.015253               |
| <b>10192</b>  | FR07918860    | 0.989728               | 0.010272               |
| <b>10349</b>  | FR07937956    | 0.521223               | 0.478777               |
| <b>10488</b>  | FR07937951    | 0.503682               | 0.496318               |

|        |            |          |          |
|--------|------------|----------|----------|
| 11887  | FR07919462 | 0.978794 | 0.021206 |
| 12242  | 12242      | 0.996245 | 0.003755 |
| 13245  | FR07921581 | 0.984998 | 0.015002 |
| 13644  | FR07886422 | 0.820295 | 0.179705 |
| 14022  | FR07919116 | 0.908253 | 0.091747 |
| 14182  | FR07919265 | 0.620503 | 0.379497 |
| 14276  | FR07886415 | 0.638200 | 0.361800 |
| 14460  | FR07937948 | 0.753428 | 0.246572 |
| 14652  | FR07921230 | 0.995640 | 0.004360 |
| 14712  | FR07921574 | 0.987846 | 0.012154 |
| 14925  | FR07919266 | 0.999990 | 0.000010 |
| 14930  | FR07918884 | 0.993515 | 0.006485 |
| 14959  | FR07921575 | 0.994056 | 0.005944 |
| 15009  | FR07921250 | 0.985709 | 0.014291 |
| 15107  | FR07921573 | 0.996415 | 0.003585 |
| 15150  | FR07886407 | 0.995766 | 0.004234 |
| 15156  | FR07919118 | 0.993400 | 0.006600 |
| 15190  | FR07921577 | 0.999990 | 0.000010 |
| 15197  | FR07919164 | 0.674958 | 0.325042 |
| 15421  | FR07921261 | 0.994361 | 0.005639 |
| 15444  | 15444      | 0.992991 | 0.007009 |
| 15467  | FR07921218 | 0.995813 | 0.004187 |
| 15626  | FR07886408 | 0.986304 | 0.013696 |
| 15628  | FR07918879 | 0.988046 | 0.011954 |
| 15633  | FR07919257 | 0.995194 | 0.004806 |
| 16413  | 16413      | 0.988271 | 0.011729 |
| 16517  | 16517      | 0.990732 | 0.009268 |
| 17199  | 17199      | 0.991020 | 0.008980 |
| 18385  | 18385      | 0.992596 | 0.007404 |
| 18929  | FR07919259 | 0.800807 | 0.199193 |
| 19181  | 19181      | 0.991495 | 0.008505 |
| 19207  | FR07919100 | 0.953595 | 0.046405 |
| 19348  | 19348      | 0.992084 | 0.007916 |
| 25347  | FR07937990 | 0.916109 | 0.083891 |
| 26196  | FR07919258 | 0.888132 | 0.111868 |
| 26988  | 26988      | 0.989914 | 0.010086 |
| 27351  | FR07919260 | 0.889554 | 0.110446 |
| 28246  | 28246      | 0.990031 | 0.009969 |
| 28279  | FR07918876 | 0.868988 | 0.131012 |
| 28635  | FR07918877 | 0.887375 | 0.112625 |
| 1X2231 | FR07919268 | 0.999990 | 0.000010 |
| 1X2816 | FR07886419 | 0.995236 | 0.004764 |
| 1X3697 | FR07886406 | 0.993218 | 0.006782 |
| 1X3796 | FR07937955 | 0.538506 | 0.461494 |
| 1X3822 | FR07886412 | 0.992174 | 0.007826 |
| 1X3837 | FR07886403 | 0.532980 | 0.467020 |
| 1X4179 | FR07919267 | 0.987968 | 0.012032 |
| 1X4209 | FR07937953 | 0.564182 | 0.435818 |
| 1X4777 | FR07886423 | 0.996056 | 0.003944 |
| 1X4853 | FR07919263 | 0.780150 | 0.219850 |
